# Supplementary material for: Assessing the mechanisms of action of natural molecules/extracts for phase-directed wound healing in hydrogel scaffolds
Source: Royal Society of Chemistry journal article supplement (doi:10.1039/d1md00100k), 2021-01-01
Supplement: d1md00100k3.pdf [file d1md00100k3.pdf]

## Supporting Information

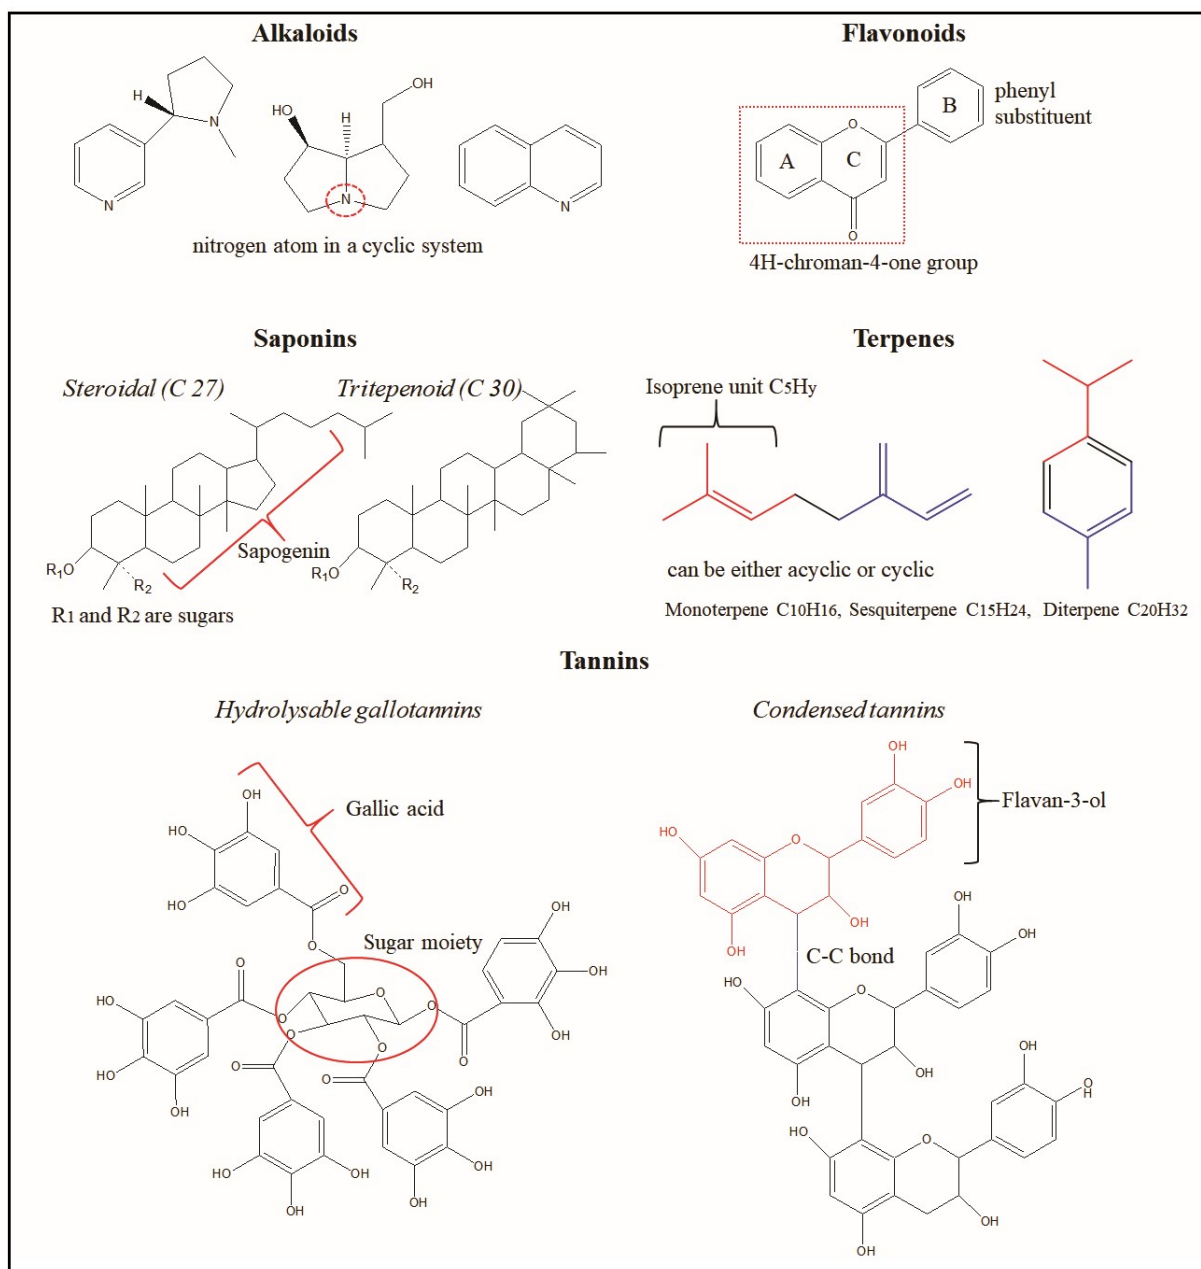

**Figure S1. General chemical structure of the natural products families for wound healing**

**Table S1. Source, extraction and physico-chemical properties of alkaloids, flavonoids, saponins, tannins and essential oils**

| <b>Natural product Family</b> | <b>Sources</b>                                                                                                                                                                       | <b>Common extraction methods</b>                                                                                                                                | <b>Physico-chemical properties</b>                                                                                                                                                                                                                                                                     |
|-------------------------------|--------------------------------------------------------------------------------------------------------------------------------------------------------------------------------------|-----------------------------------------------------------------------------------------------------------------------------------------------------------------|--------------------------------------------------------------------------------------------------------------------------------------------------------------------------------------------------------------------------------------------------------------------------------------------------------|
| Alkaloids <sup>1</sup>        | Flowering plants (e.g. <i>Papaver somniferum</i> , <i>Alstonia Boonei</i> , <i>Croton lechleri</i> )<br><br>Also present in some frogs and lizards                                   | Solvent extraction using ethanol<br>Silica gel chromatography<br><br>Purification and identification can be done with HPLC                                      | Contain nitrogen atoms in some cyclic system, leading to their alkalinity<br>Usually colorless, odorless solids with a bitter taste                                                                                                                                                                    |
| Flavonoids <sup>2</sup>       | Present in several fruits and vegetables, roots, flowers, grains and tea.                                                                                                            | Solvent extraction.<br>Soxhlet apparatus using hexane for defatting, followed by ethyl acetate or ethanol.                                                      | Polyphenolic structure. Structure generally consists of a 15-carbon backbone with 2 phenyl rings and a heterocyclic ring with an embedded oxygen.<br>Classified depending on the degree of oxidation, unsaturation of the linking chain and chemical structure.<br>Often responsible for flower color. |
| Saponins <sup>3</sup>         | Ginseng, Indian pennywort, soapwort, legumes such as kidney beans and lentils.                                                                                                       | Solvent extraction using alcohols such as ethanol and methanol. Can be further purified using HPLC.                                                             | They are glycosides attached to a triterpene of steroid.<br><br>Can be used as an emulsifying agent. Soluble in both water and fat. Bitter taste.                                                                                                                                                      |
| Tannins <sup>4</sup>          | Various trees and shrubs such as black mimosa bark, oak bark, chestnut wood and mangrove wood, teas shrubs                                                                           | Solvent extraction in water, alcohols or water. A Soxhlet apparatus can also be used.<br><br>Purification and identification can be done using HPLC             | Can broadly be classified as hydrolysable and condensed tannins.<br>Molecular weights ranging from 500 to 20,000 Daltons.<br>Possess an astringent taste and are soluble in polar solvents such as water and some alcohols.                                                                            |
| Essential Oils <sup>5</sup>   | Aromatic medicinal plants such as lavender, thyme, peppermint, tea tree. Fruit peels (e.g., citrus, orange) also used.<br>Most commonly extracted from the flowers, leaves and bark. | Hydro-distillation, steam distillation or supercritical CO <sub>2</sub> extraction. Solvent extraction with non-polar solvents such as hexane can also be used. | Usually clear volatile oils with a pleasant smell. Often used for aromatherapy. Mixture of several compounds.<br><br>Some pure essential oils can cause contact dermatitis                                                                                                                             |

**Table S2. *In vivo* results of alkaloids in wound healing**

| <b>Molecule</b>                                            | <b>Source</b>                                                                              | <b>Wound healing models</b>                                                                    | <b>Dosage</b>                                                                                  | <b>Wound healing phase</b> | <b>Action</b>                                                                                                                                                           |
|------------------------------------------------------------|--------------------------------------------------------------------------------------------|------------------------------------------------------------------------------------------------|------------------------------------------------------------------------------------------------|----------------------------|-------------------------------------------------------------------------------------------------------------------------------------------------------------------------|
| Total alkaloid extract <sup>6</sup>                        | Root bark of <i>Alstonia boonei</i>                                                        | Sprague-Dawley rats of either sex                                                              | 10 mg/ml and above                                                                             | Proliferative              | Anti-bacterial activity against several gram-positive and gram-negative strains. Faster re-epithelization than negative control and silver sulfadiazine treated groups. |
| Taspine <sup>7,8</sup>                                     | Latex of <i>Croton lechleri</i>                                                            | <input type="checkbox"/> Male Sprague-Dawley rats<br>Full thickness paired linear incisions    | 250 µg                                                                                         | Proliferative              | Non-toxic to human foreskin fibroblasts at concentration below 150ng/ml. Promote migration of fibroblasts in early phases of wound healing.                             |
| Betaine/<br>Betaine enriched ointment extract <sup>9</sup> | Pure compound from natural Remedies, India<br>Plant extract from <i>Evolvus alsinoides</i> | <input type="checkbox"/> Excision wound<br>Inbred Wistar albino rats of either sex (6–7 weeks) | 0.1380-0.3056 µg                                                                               | Proliferative              | Accelerate wound closure. Enhance collagenization due to chemotactic properties on fibroblast. Promote neovascularization.                                              |
| Mahanimbicine <sup>10</sup>                                | Extract of <i>Murraya koenigii</i> compared to pure compounds                              | Full thickness wound<br>Female Sprague Dawley rats                                             | Thin layer of ointment containing 50 mg of molecule or extract applied twice daily for 14 days | Proliferative              | Accelerate wound closure. Reduce infiltration of inflammatory cells. Promote fibroblast proliferation and enhance collagenization.                                      |

**Table S3. *In vivo* results of flavonoids and saponins in wound healing**

| Molecule                | Source        | Wound healing models                                                     | Dosage                          | Wound healing phase | Action                                                                                                                                                                                                                                                                                                                                                                                                                                                    |
|-------------------------|---------------|--------------------------------------------------------------------------|---------------------------------|---------------------|-----------------------------------------------------------------------------------------------------------------------------------------------------------------------------------------------------------------------------------------------------------------------------------------------------------------------------------------------------------------------------------------------------------------------------------------------------------|
| <b>Flavonoids</b>       |               |                                                                          |                                 |                     |                                                                                                                                                                                                                                                                                                                                                                                                                                                           |
| Quercetin <sup>11</sup> | Sigma-Aldrich | <input type="checkbox"/> Pressure ulcer model<br>C57BL/6 mice            | 1 $\mu$ M                       | Inflammatory        | Accelerate wound closure.<br>Anti-inflammatory- reduction in myeloperoxidase (MPO) + neutrophils, CD38+ macrophages, TNF- $\beta$ , IL-1 $\beta$ cytokines in wound area.<br>Suppress activation of MAPK kinases-ENK, JNK and p38.                                                                                                                                                                                                                        |
| Quercetin <sup>12</sup> | Not provided  | <input type="checkbox"/> Diabetic wound<br>Male Sprague-Dawley (SD) rats | 10 - 40 mg/ml                   | Inflammatory        | Accelerate wound closure in a dose dependent manner- better fibroblast and collagen distribution and angiogenesis rate- high expression level of CD31 and VEGF.<br>Anti-inflammatory –<br>Promote M1 to M2 polarization (low expression of <input type="checkbox"/> M1 marker iNOS and high expression of <input type="checkbox"/> M2 markers Msr-1; low level of pro-inflammatory factors IL-6, TNF- $\alpha$ and high level of anti-inflammatory IL-10. |
| Quercetin <sup>13</sup> | Not provided  | <input type="checkbox"/> Full thickness wound<br>Adult male Wistar rats  | 0.1 – 10%                       | Inflammatory        | Accelerate wound closure at 0.1% quercetin-high fibroblast proliferation, thick and well-oriented collagen fibers.<br>Antioxidant- No significant differences in levels of SOD, MDA, O <sub>2</sub> radicals, total thiols and proteins except for catalase. Increase in catalase in quercetin treated wounds.                                                                                                                                            |
| Quercetin <sup>14</sup> | Not provided  | Excision wound<br>Wild-type C57Bl/6J mice                                | 100 $\mu$ L of 10 $\mu$ M daily | Proliferative       | Reduce scarring via fibrosis reduction resulting from an increase in cell surface expression of alpha-V integrin which promotes cell migration to the wound site in absence of excessive extracellular matrix deposition.                                                                                                                                                                                                                                 |

|                                                                                                                                |                                                            |                                                                                                                                           |                 |                                |                                                                                                                                                                                                                                                                                                                                                                                                               |
|--------------------------------------------------------------------------------------------------------------------------------|------------------------------------------------------------|-------------------------------------------------------------------------------------------------------------------------------------------|-----------------|--------------------------------|---------------------------------------------------------------------------------------------------------------------------------------------------------------------------------------------------------------------------------------------------------------------------------------------------------------------------------------------------------------------------------------------------------------|
| Luteolin (LUT)/<br>Flavonoids<br>extract <sup>15</sup>                                                                         | <i>Martynia annua</i><br>Linn. leaves<br>(MAF)             | <input type="checkbox"/> Excision wound<br>Wistar albino rats                                                                             | 0.2 - 0.5 % w/w | Remodeling                     | Accelerate wound closure and higher level of hydroxyproline - 100% and 87.61% closure; 51.67 and 39.62 mg/g for MAF and 0.5% LUT respectively compared to control (72.17% and 23.29%).<br>No scarring and dense fibrous tissue and blood capillaries in MAF treated groups<br>Antioxidant – Increase in SOD, CAT and GSH in 0.5% w/w LUT and MAF treated wounds.                                              |
| Apigenin/<br>Crude extract of<br><input type="checkbox"/> flowers and<br>their solvent or<br>column fractions<br><sup>16</sup> | Flowers of<br><i>Helichrysum</i><br><i>graveolens</i> (Hg) | <input type="checkbox"/> Male Sprague–<br>Dawley rats<br>and Swiss albino mice<br>Linear incision and<br>circular excision<br>wound model | 1%              | Inflammatory<br>and remodeling | Apigenin, <input type="checkbox"/> Hg–MeOH, Hg–EtOAc, Hg–Fr.B accelerate wound closure with denser collagen deposition.<br>Anti-inflammatory - Apigenin, Hg–MeOH, Hg–EtOAc, Hg–Fr.B inhibit inflammation by 27.8%, 37.1%, 30.7% and 24.5%.<br>Antioxidant- Apigenin showed higher DPPH scavenging activity (IC <sub>50</sub> -31.04 µg/ml) compared to quercetin (reference) (IC <sub>50</sub> - 2.14 µg/ml). |
| Kaempferol<br>(KM) <sup>17</sup>                                                                                               | Sigma-Aldrich                                              | <input type="checkbox"/> Male Wistar rats<br>(3-4 months)<br>Diabetic and non-<br>diabetic<br>Excision and incision<br>wounds             | 0.5-1%          | Inflammatory<br>and remodeling | Accelerate wound healing in all conditions; promote hydroxyproline content to a larger extent in non-diabetic wounds than in diabetic wounds. General decrease in angiogenesis in both diabetic and non-diabetic rats.<br>Tensile strength of wounds treated with 0.5% KM higher than those treated with 1% KM on day 14 in both conditions.<br>Anti-inflammatory and antioxidant.                            |
| Naringenin <sup>18</sup>                                                                                                       | Not provided                                               | <input type="checkbox"/> Hypertrophic scar<br>model<br>Female KM mice,<br>8-weeks-old                                                     | 25-50 µM        | Inflammatory<br>and remodeling | Reduction in scar formation in dose dependent manner – decrease in $\alpha$ -SMA expression and number of $\alpha$ -SMA positive cells in naringenin treated wounds.<br>Anti-inflammatory- Reduction in CD68+ cells and CD4+ cells in the scar tissues of a naringenin-treated mouse with dose dependency.                                                                                                    |
| Genistein <sup>19</sup>                                                                                                        | Sigma-Aldrich                                              | Hypertrophic Scar                                                                                                                         | 25-100 mmol/l   | Remodeling                     | Scar reduction in dose and timely manner- reduced                                                                                                                                                                                                                                                                                                                                                             |

|                                                                                                     |                          |                                                                                                             |                                 |                                               |                                                                                                                                                                                                                                                                                                                                                              |
|-----------------------------------------------------------------------------------------------------|--------------------------|-------------------------------------------------------------------------------------------------------------|---------------------------------|-----------------------------------------------|--------------------------------------------------------------------------------------------------------------------------------------------------------------------------------------------------------------------------------------------------------------------------------------------------------------------------------------------------------------|
|                                                                                                     |                          | explant- □scar resection at 6– 12 months after severe burn.<br><br>□Males & females people aged 10–37 years | added to culture media          |                                               | stretching and proliferation of hypertrophic scar fibroblasts (HFSBs) (at 48 and 72h of culture only); reduced expression of COL I and COL III with 50 and 100 nmol/l of genistein. Suppress TPK activation and RTK-Ras- MAPK (ERK/p38) signal transduction in HFSBs.<br>No significant effect on proliferation of normal human fibroblast <i>in vitro</i> . |
| Hesperidin <sup>20</sup>                                                                            | Not provided             | Diabetic and non-diabetic adult rats                                                                        | 10-80 mg/kg                     | Antioxidant, anti-inflammatory & angiogenesis | Dose-dependent increase in SOD, GSH and HDP activity and dose-dependent decrease in MDA and MPO, TNF- $\alpha$ and IL-6 levels.<br>Maximum expression of VEGF in rats treated with 80mg/kg of hesperidin. Dose-dependent increase in VEGFR1 and VEGFR2 expression.                                                                                           |
| Formononetin <sup>21</sup>                                                                          | Not provided             | Transgenic Zebrafish models                                                                                 | 25-50 $\mu$ M                   | Proliferative & remodeling                    | Increase in angiogenic sprouting in subintestinal vessels (SIVs) in a dose dependent manner- 50 $\mu$ M formononetin increased length of sprouting vessels and endothelial cell proliferation similar to the effects induced by VEGF-A injection.                                                                                                            |
| <b>Saponins</b>                                                                                     |                          |                                                                                                             |                                 |                                               |                                                                                                                                                                                                                                                                                                                                                              |
| Total ginseng saponins (Rb1, Rb2, Rc, Rd, Re, Rf, Rg1, Rg2, Rg3, Rh1 and Rh2) <sup>22</sup>         | Korea Ginseng            | ICR mice- incised skin wound                                                                                |                                 | Inflammatory & proliferative                  | Accelerate re-epithelization by increasing rate of keratin cell migration; inhibit inflammatory reactions during early stage and promote collagen synthesis.                                                                                                                                                                                                 |
| Ginsenoside Rb1 <sup>23</sup>                                                                       | Red Ginseng roots        | Male Balb/c mice (5 weeks old)- burn wounds                                                                 | 100 fg/ml-1 ng/ml               | Proliferative                                 | Enhance neovascularization <i>in vitro</i> by increasing VEGF and HIF- $\alpha$ expression induced by IL-1 $\beta$ in HaCaT cells.                                                                                                                                                                                                                           |
| Saponin extracts ( $\beta$ -sitosterol, asiatic acid, asiaticoside and madecassoside) <sup>24</sup> | <i>Centella asiatica</i> | Male Sprague–Dawley rats weighing 250–300 g- incision and burn wounds                                       | 10% topical solution once daily | Inflammatory & proliferative                  | Mild degree of swelling, accelerated re-epithelization and keratinization and marked hair growth in extract-treated wounds in rats.                                                                                                                                                                                                                          |
| Asiaticoside <sup>25,26</sup>                                                                       | <i>Centella asiatica</i> | Guinea pigs (male,                                                                                          | 0.4% topical                    | Proliferative                                 | Accelerate re-epithelization and fibroblast                                                                                                                                                                                                                                                                                                                  |

|                                                                       |                                                                                   |                                                                                                                                                                                                                                                                             |                                                   |                              |                                                                                                                                                                                                                                                                                                                                                                       |
|-----------------------------------------------------------------------|-----------------------------------------------------------------------------------|-----------------------------------------------------------------------------------------------------------------------------------------------------------------------------------------------------------------------------------------------------------------------------|---------------------------------------------------|------------------------------|-----------------------------------------------------------------------------------------------------------------------------------------------------------------------------------------------------------------------------------------------------------------------------------------------------------------------------------------------------------------------|
|                                                                       |                                                                                   | 300–325 g)- cutaneous (full thickness, completely transdermal) circular wounds of 8 mm diameter<br>Sprague Dawley male rats (150–180 g)- diabetes induced via streptozotocin injection<br>Male Sprague Dawley rats (200–220 g)- circular, skin-deep wounds of 8 mm diameter | solution<br><br>0.2% topical solution twice daily | Inflammatory                 | proliferation in diabetic rats. Increase in hydroxyproline content and tensile strength of healed tissue.<br><br>Increase in antioxidants in regenerated tissue of cutaneous wounds in rats at initial stage of healing: superoxide dismutase, catalase, glutathione (GSH) peroxidase, vitamin E and ascorbic acid.<br>Significant decrease in lipid peroxide levels. |
| Madecassoside <sup>27</sup>                                           | <i>Centella asiatica</i><br>Herbs                                                 | Male ICR mice (18 – 22 g), and male Sprague-Dawley rats, (180 – 220g)- burn wounds                                                                                                                                                                                          | 24 mg/kg oral solution for 20 days                | Inflammatory & proliferative | Limits infiltration of inflammatory cells enhances proliferation of fibroblasts and neo-vascularisation in treated skin of burn wounds in mice.<br>Decrease in nitric oxide (NO) and malondialdehyde MDA (end product of lipid peroxidation) levels and increase in GSH and hydroxyproline levels in treated mice,                                                    |
| Astragaloside VI & Cycloastragenol-6-O-beta-D-glucoside <sup>28</sup> | Astragali Radix (Dried roots of <i>Astragalus membranaceus var. mongholicus</i> ) | Male C57BL/6JNarl mice, (eight-week-old) (20–25g)- Staphylococcus aureus infected, non-infected traumatic wound models                                                                                                                                                      | 10 mM in Vaseline. Dressing changed every 2 days  | Proliferative and Remodeling | Promote angiogenesis and accelerate wound closure of both non-infected and staphylococcus-aureus infected wounds in mice.<br>Improve migration and proliferation of HaCaT and HDF skin cells via activation of the EGFR/ERK signaling pathway.                                                                                                                        |

|                                |                                                                                          |                                                                     |                                                                               |                                   |                                                                                                                                                                                                                                                                                                                                                                                                                                                                                                                                                                                                                                                                                                                     |
|--------------------------------|------------------------------------------------------------------------------------------|---------------------------------------------------------------------|-------------------------------------------------------------------------------|-----------------------------------|---------------------------------------------------------------------------------------------------------------------------------------------------------------------------------------------------------------------------------------------------------------------------------------------------------------------------------------------------------------------------------------------------------------------------------------------------------------------------------------------------------------------------------------------------------------------------------------------------------------------------------------------------------------------------------------------------------------------|
| Cycloastragenol <sup>29</sup>  | Astragali Radix (Dried roots of <i>Astragalus membranaceus</i> var. <i>mongholicus</i> ) | -                                                                   | 0.3mM                                                                         | Proliferative                     | Promote migration and proliferation of human epidermal stem cells (EpSCs) by activating Wnt/ $\beta$ -catenin pathway contributing to increased TERT expression in EpSCs.                                                                                                                                                                                                                                                                                                                                                                                                                                                                                                                                           |
| Astragaloside IV <sup>30</sup> | <i>Astragalus membranaceus</i> (Fisch) Bge                                               | -                                                                   | 40-160 $\mu$ g/ml                                                             | Proliferative and remodeling      | Attenuate LiCl induced S phase cell cycle arrest in keratinocytes.<br>Promote migration and proliferation of keratinocytes by down-regulating $\beta$ -catenin expression and up-regulating proliferating cell nuclear antigen (PCNA) expression.                                                                                                                                                                                                                                                                                                                                                                                                                                                                   |
| Lupeol <sup>31,32</sup>        | <i>Bowdichia virgilioides</i>                                                            | Male Wistar rats (250 g $\pm$ 2 g)- full thickness excisional wound | <i>In vitro</i> 0.1-20 $\mu$ g/ml<br><br><i>In vivo</i> 0.2% w/w lupeol cream | Inflammatory<br><br>Proliferative | Reduce inflammation-upregulation of MMP-2 and reduced NF- $\kappa$ B expression <i>in vitro</i> .<br>Reduced inflammatory cells infiltration, proinflammatory cytokine, IL6 and NF- $\kappa$ B expression, increased anti-inflammatory cytokine, IL-10 and SOD, HO-1 enzyme expression <i>in vivo</i> .<br>Improved migration of human epidermal keratinocytes and expression of Akt, p38 and Tie-2 signaling proteins involved in cell proliferation, migration and angiogenesis <i>in vitro</i> .<br>Increase migration and proliferation of fibroblasts and neovascularisation <i>in vivo</i> - strong expression of FGF-2, collagen type III and angiogenic growth factors, TGF- $\beta$ 1 and Hif-1 $\alpha$ . |



**Table S4. *In vivo* results of tannins and essential oils in wound healing**

| Molecule                               | Source                                             | Wound healing models                                                                                                                             | Dosage                                                             | Wound healing phase | Action                                                                                                                                                                                                                                  |
|----------------------------------------|----------------------------------------------------|--------------------------------------------------------------------------------------------------------------------------------------------------|--------------------------------------------------------------------|---------------------|-----------------------------------------------------------------------------------------------------------------------------------------------------------------------------------------------------------------------------------------|
| <b>Tannins</b>                         |                                                    |                                                                                                                                                  |                                                                    |                     |                                                                                                                                                                                                                                         |
| Tannin extracts (81%) <sup>33</sup>    | Immature fruits of Terminalia chebula Fructus Retz | Adult male Sprague-Dawley rats. (200-220g) Acute excision                                                                                        | 5 mg                                                               | Inflammatory        | Higher VEGFA mRNA expression and amount of newly formed capillaries during early stages of wound healing compared to erythromycin ointment and Vaseline. Antibacterial activity against staphylococcus aureus and Klebsiella pneumonia. |
| Tannic acid <sup>34</sup>              | Solarbio Corp.                                     | Male Sprague Dawley rats (200-220g)                                                                                                              | <i>In vitro</i><br>0.1-0.4 µg/ml<br><i>In vivo</i><br>0.5-1.5 g/ml | Proliferative       | Accelerated re-epithelization similar to Yunnan Baiyao treated group. Promote thin epidermis with well-formed hair follicles and organized collagen and reduce scarring. Higher expression of bFGF, TGF-β, FN and VEGF.                 |
| Proanthocyanidin extract <sup>35</sup> | Grape seed                                         | Male BalbC mice Full thickness excisional dermal wound model                                                                                     | 25 µL of 100 mg/mL                                                 | Proliferative       | Accelerated wound contraction and better organized regenerating tissue compared to placebo-treated wound. Upregulates VEGF transcription.                                                                                               |
| <b>Essential Oils</b>                  |                                                    |                                                                                                                                                  |                                                                    |                     |                                                                                                                                                                                                                                         |
| Carvacrol <sup>36</sup>                | Sigma-Aldrich                                      | Male wistar-albino rats Full-thickness skin wounds                                                                                               | 200 µl of 12.5% in sunflower oil for 5 days                        | Proliferative       | Increased granulation tissue by modulating TNF-α, IL-1β and TGF-β expressions                                                                                                                                                           |
| D-limonene <sup>37</sup>               | Sigma-Aldrich                                      | Hairless Skh1 female mice Inflammation induced daily using 12-O-Tetradecanoylphorbol-13-acetate dissolved in acetone Full thickness dorsal wound | 10 mg/kg D-limonene in sunflower oil                               | Inflammatory        | Accelerated wound closure. Anti-angiogenic effect. Reduce pro-inflammatory cytokines.                                                                                                                                                   |

|                                                                                                              |                                                      |                                                                                                               |                                                                                       |                              |                                                                                                                            |
|--------------------------------------------------------------------------------------------------------------|------------------------------------------------------|---------------------------------------------------------------------------------------------------------------|---------------------------------------------------------------------------------------|------------------------------|----------------------------------------------------------------------------------------------------------------------------|
| Limonene and fenchone (components of <i>Foeniculum vulgare</i> ) <sup>38</sup>                               | Sigma-Aldrich                                        | Male Sprague-Dawley rats<br>Full thickness excisional wound model                                             | 1:1 mixture of limonene and/or fenchone in olive oil                                  | Inflammatory & Proliferative | Promote regular and denser collagen deposition, enhance angiogenesis and improve re-epithelization                         |
| Sesquiterpenoids (cedrol and widdrol) <sup>39</sup>                                                          | <i>Juniperus occidentalis</i>                        | Male Sprague-Dawley rats<br><br>Linear and circular dorsal wound models                                       | 1% w/w of test ointment (glycerol stearate, 1,2-propylene glycol and liquid paraffin) | Inflammatory & Proliferative | High hydroxyproline content and faster re-epithelization in <i>J.occidentalis</i> essential oil treated wounds.            |
| Cinnamaldehyde (CA) <sup>40</sup>                                                                            | Beijing Naturally Occurring Drugs Research Institute | Male diabetic (BSK.Cg-m+/ <i>Lepr</i> <sup>db</sup> ;db/db) and WT mice.<br>Full thickness dorsal wound model | 25-100 mg/kg CA intraperitoneal injection.                                            | Proliferative                | Accelerated wound healing & promotion of angiogenesis via activation of PI3K and MAPK signaling pathways.                  |
| Trans-cinnamaldehyde <sup>41</sup>                                                                           | Sigma-Aldrich                                        | Female Swiss mice<br>Full thickness dorsal skin wound inoculated with <i>P.aeruginosa</i>                     | 30 µL of 0.5 mg/mL sterile cinnamaldehyde applied topically                           | Proliferative                | Faster healing in treated mice.<br>Reduction in secretion of VEGF, IL6, IL-17, and NO.                                     |
| Cinnamon essential oil (54% cinnamic aldehyde, 12.3% α-copaene, 7% styrene, ethenyle, benzebe) <sup>42</sup> | <i>Cinnamomum verum</i> bark                         | BALB/c mice<br><br>Full thickness dorsal wound inoculated with <i>S.aureus</i> and <i>P.aeruginosa</i>        | 2-4% w/w oil in soft yellow paraffin                                                  | Proliferative                | Upregulated VEGF, IGF-1 and FGF-2 expression in infected model.<br><br>Increased collagen synthesis and re-epithelization. |

## References

- 1 J. Kurek, in *Alkaloids - Their Importance in Nature and Human Life*, IntechOpen, 2019.
- 2 A. N. Panche, A. D. Diwan and S. R. Chandra, *J. Nutr. Sci.*, 2016, **5**, 1–15.
- 3 D. Kregiel, J. Berlowska, I. Witonska, H. Antolak, C. Proestos, M. Babic, L. Babic and B. Zhang, in *Application and Characterization of Surfactants*, IntechOpen, 2017.
- 4 A. Pizzi, in *Monomers, Polymers and Composites from Renewable Resources*, Elsevier Ltd, 2008, pp. 179–199.
- 5 J. Reichling, P. Schnitzler, U. Suschke and R. Saller, *Complement. Med. Res.*, 2009, **16**, 79–90.
- 6 J. P. Fetse, J. O. Kyekyeku, E. Dueve and K. B. Mensah, *Br. J. Pharm. Res.*, 2014, 2642–2652.
- 7 A. J. Vaisberg, M. Milla, M. C. Planas, J. L. Cordova, E. R. de Agusti, R. Ferreyra, M. C. Mustiga, L. Carlin and G. B. Hammond, *Planta Med.*, 1989, **55**, 140–143.
- 8 B. H. Porras-Reyes, T. A. Mustoe, W. H. Lewis, J. Roman and L. Simchowitz, *Proc. Soc. Exp. Biol. Med.*, 1993, **203**, 18–25.
- 9 S. Mahibalan, M. Stephen, R. T. Nethran, R. Khan and S. Begum, *Pharm. Biol.*, 2016, **54**, 2851–2856.
- 10 T. Nagappan, T. C. Segaran, M. E. A. Wahid, P. Ramasamy and C. S. Vairappan, *Molecules*, 2012, **17**, 14449–14463.
- 11 G. Yin, Z. Wang, Z. Wang and X. Wang, *Exp. Dermatol.*, 2018, **27**, 779–786.
- 12 J. Fu, J. Huang, M. Lin, T. Xie and T. You, *J. Surg. Res.*, 2019, **246**, 213–223.
- 13 V. Kant, B. L. Jangir, A. Nigam, V. Kumar and S. Sharma, *Wound Med.*, 2017, **19**, 82–87.
- 14 K. M. Doersch and M. K. Newell-Rogers, *Exp. Biol. Med.*, 2017, **242**, 1424–1431.
- 15 S. Lodhi and A. K. Singhai, *Asian Pac. J. Trop. Med.*, 2013, **6**, 253–259.
- 16 I. Süntar, E. Küpeli, H. Keles, E. Yesilada and S. D. Sarker, *J. Ethnopharmacol.*, 2013, **149**, 103–110.
- 17 Y. Ozay, S. Guzel, O. Yumrutas, B. Pehlivanoglu, I. H. Erdogdu, Z. Yildirim, B. A. Turk and S. Darcan, *J. Surg. Res.*, 2019, **233**, 284–296.
- 18 S. Shan, Y. Zhang, M. I. N. Wu, B. O. Yi, J. Wang and Q. Li, *ACS Omega*, 2017, 4643–4649.
- 19 C. Cao, S. Li, X. Dai, Y. Chen, Z. Feng, Y. Zhao and J. Wu, 2009, **35**, 89–97.
- 20 L. Wang, T. He, A. Fu, Z. Mao and L. Yi, *Eur. J. Inflamm.*, , DOI:10.1177/2058739218775255.
- 21 S. Li, Y. Dang, X. Zhou, B. Huang, X. Huang, Z. Zhang, Y. W. Kwan, S. W. Chan, G. Pak, H. Leung, S. Ming, Y. Lee, M. Pui and M. Hoi, *Nat. Sci. Reports*, 2015, **5**, 16815.
- 22 Y. S. Kim, I. Cho, M. Jeong, S. Jeong, S. Y. Nah, Y. Cho, S. H. Kim, A. Go, S. E. Kim, S. S. Kang, C. J. Moon, J. C. Kim, S. H. Kim and C. S. Bae, 2011, **35**, 360–367.
- 23 Y. Kimura, M. Sumiyoshi, K. Kawahira and M. Sakanaka, *Br. J. Pharmacol.*, 2006, **148**, 860–870.
- 24 J. Somboonwong, M. Kankaisre, B. Tantisira and M. H. Tantisira, *BMC Complement. Altern. Med.*, , DOI:10.1186/1472-6882-12-103.
- 25 A. Shukla, A. M. Rasik, G. K. Jain, R. Shankar and D. K. Kulshrestha, *J. Ethnopharmacol.*, 1999, **65**, 1–11.
- 26 A. Shukla, A. M. Rasik and B. N. Dhawan, *Phyther. Res.*, 1999, **13**, 50–54.
- 27 M. Liu, Y. Dai, Y. Li, Y. Luo, F. Huang, Z. Gong and Q. Meng, *Planta Med.*, 2008, **74**, 809–815.
- 28 S. Lee, S. Lee, W. Chang, Z. Li, N. S. Kirkby and W. Tsai, *Phytomedicine*, 2019, **38**,

- 183–191.
- 29 Y. Cao, L. Xu, X. Yang, Y. Dong, H. Luo, F. Xing and Q. Ge, *Biomed Res. Int.*
- 30 F. L. Li, X. Li, Y. F. Wang, X. L. Xiao, R. Xu, J. Chen, B. Fan, W. Bin Xu, L. Geng  
and B. Li, *Evidence-based Complement. Altern. Med.*, , DOI:10.1155/2012/956107.
- 31 F. P. Beserra, M. Xue, G. Lemos, D. A. Maia, A. L. Rozza and C. J. Jackson,  
*Molecules*, 2018, **23**, 2819.
- 32 F. P. Beserra, A. J. Vieira, L. Fernando, S. Gushiken, E. O. De Souza, M. F. Hussni, C.  
A. Hussni, R. H. Nóbrega, E. Ricardo, M. Martinez, C. J. Jackson, G. Lemos, D. A.  
Maia, A. L. Rozza and C. H. Pellizzon, *Oxid. Med. Cell. Longev.*, ,  
DOI:10.1155/2019/3182627.
- 33 K. Li, Y. Diao, H. Zhang, S. Wang, Z. Zhang, B. Yu, S. Huang and H. Yang, *BMC*  
*Complement. Altern. Med.*, 2011, **11**, 86.
- 34 Y. Chen, L. Tian, F. Yang, W. Tong, R. Jia, Y. Zou, L. Yin, L. Li, C. He, X. Liang, G.  
Ye, C. Lv, X. Song and Z. Yin, *Adv. Wound Care*, 2019, **8**, 341–354.
- 35 S. Khanna, M. Venojarvi, S. Roy, N. Sharma, P. Trikha, D. Bagchi, M. Bagchi and C.  
K. Sen, *Free Radic. Biol. Med.*, 2002, **33**, 1089–1096.
- 36 M. Y. Gunal, A. O. Heper and N. Zaloglu, *Pharmacogn. J.*, 2014, **6**, 10–14.
- 37 P. d'Alessio, M. Mirshahi, J.-F. Bisson and M. Bene, *Antiinflamm. Antiallergy. Agents*  
*Med. Chem.*, 2014, **13**, 29–35.
- 38 I. Keskin, Y. Gunal, S. Ayla, B. Kolbasi, A. Sakul, U. Kilic, O. Gok, K. Koroglu and  
H. Ozbek, *Biotech. Histochem.*, 2017, **92**, 274–282.
- 39 I. Tumen, I. Süntar, F. J. Eller, H. Keleş and E. K. Akkol, *J. Med. Food*, 2013, **16**, 48–  
55.
- 40 X. Yuan, L. Han, P. Fu, H. Zeng, C. Lv, W. Chang, R. S. Runyon, M. Ishii, L. Han, K.  
Liu, T. Fan, W. Zhang and R. Liu, *Lab. Investig.*, 2018, **98**, 783–793.
- 41 T. A. F. Ferro, E. B. Souza, M. A. M. Suarez, J. F. S. Rodrigues, D. M. S. Pereira, S. J.  
F. Mendes, L. F. Gonzaga, M. C. A. M. Machado, M. R. Q. Bomfim, J. B. Calixto, J.  
L. Arbiser, V. Monteiro-Neto, E. André and E. S. Fernandes, *Molecules*, 2019, **24**,  
1627.
- 42 S. G. Seyed Ahmadi, M. R. Farahpour and H. Hamishehkar, *Kaohsiung J. Med. Sci.*,  
2019, **35**, 686–694.
