# Supplementary figures and images for: Assessing the mechanisms of action of natural molecules/extracts for phase-directed wound healing in hydrogel scaffolds
Source: Royal Society of Chemistry journal article supplement (doi:10.1039/d1md00100k), 2021-01-01

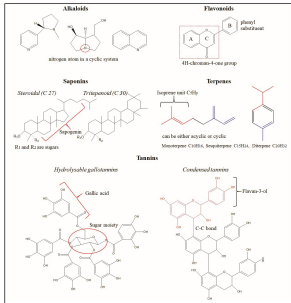

Supplement: d1md00100k2.pdf [file d1md00100k2.pdf]
